# Supplementary material for: Hypoxia Selectively Impairs CAR-T Cells In Vitro
Source: PubMed Central journal article supplement (PMC6562712; doi:10.3390/cancers11050602), 2019-04-30
Supplement: cancers-11-00602-s001.pdf [file cancers-11-00602-s001.pdf]

## Supplementary Materials: Hypoxia Selectively Impairs CAR-T Cells In Vitro

Robert Berahovich, Xianghong Liu, Hua Zhou, Elias Tsadik, Shirley Xu, Vita Golubovskaya and Lijun Wu

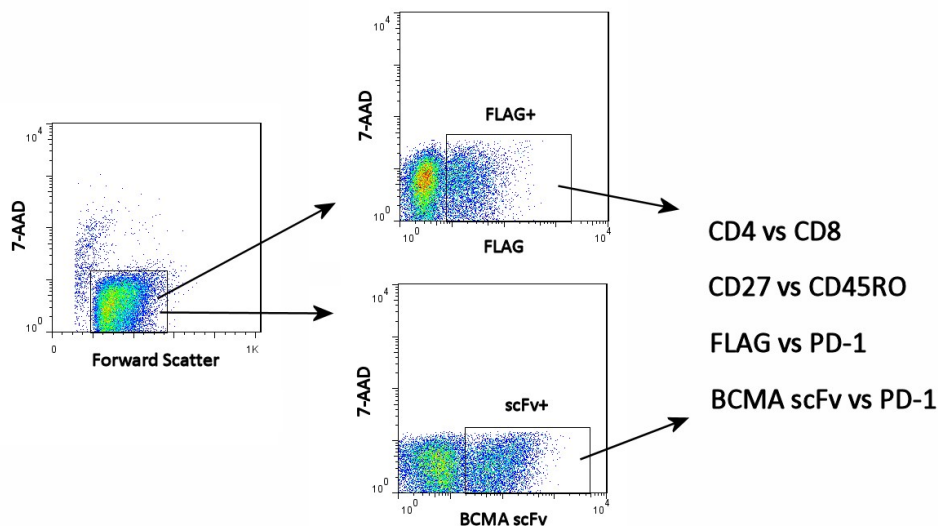

**Figure S1.** Gating strategies used to identify cells by flow cytometry. Cells were first analyzed by forward light scatter versus 7-AAD staining (left plot), and a gate was drawn around the live (i.e., 7-AAD-negative) cells. Next, the live cells were analyzed for binding to the FLAG antibody (CD19 CAR-T cells, middle top plot) or to the BCMA protein (BCMA CAR-T cells, middle bottom plot). Gates were drawn around the stained cells, and the gated cells (CAR-T cells) were analyzed for CD4 vs CD8 antibody staining (Figure 4) and CD27 vs CD45RO antibody staining (Figure 3). In the case of control T cells, all the live cells were analyzed for CD4 vs CD8 and CD27 vs CD45RO. For PD-1 expression, all the live cells were analyzed for PD-1 antibody binding vs FLAG antibody binding (CD19 CAR-T cells) or BCMA protein binding (BCMA CAR-T cells).

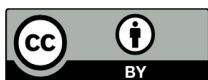

© 2019 by the authors. Licensee MDPI, Basel, Switzerland. This article is an open access article distributed under the terms and conditions of the Creative Commons Attribution (CC BY) license (<http://creativecommons.org/licenses/by/4.0/>).
